# Supplementary material
Source: HighWire-hosted journal article supplement (https://cmaj.ca/highwire/filestream/150661/field_highwire_adjunct_files/2/231419-res-3-at.pdf)
Supplement: 231419-res-3-at.pdf [file 231419-res-3-at.pdf]

### Appendix III: Chronic conditions

| Chronic conditions included in the algorithm based on healthcare utilization (n=13) |
|-------------------------------------------------------------------------------------|
| Cancer                                                                              |
| Congestive Heart Failure (CHF)                                                      |
| Chronic Obstructive Pulmonary Disease (COPD)                                        |
| Coronary Artery Disease (CAD)                                                       |
| Dementia                                                                            |
| Diabetes                                                                            |
| Hepatitis C                                                                         |
| Human Immunodeficiency Virus (HIV)                                                  |
| Infective Endocarditis                                                              |
| (Other) Mental Health Conditions                                                    |
| Non-psychotic Mood and Anxiety Disorders                                            |
| Renal Disease                                                                       |
| Stroke                                                                              |
